# Supplementary material
Source: MDPI journal article supplement (https://www.mdpi.com/2076-0752/8/1/7)
Supplement: s1 [file s1]

## *Material Journeys*

This little boat set out on a journey...

its material journey

from idea

to work in progress

to final, finished work

Took many forms of energy

Of thinking power  
designing, drawing, problem solving, researching

Of manual making power  
shaping, forming, wiping, grinding, polishing, cleaning...

But I wanted to know the 'other' embodied energy; of the material journey in making this little boat

This journey took us down the rabbit hole...  
of carbon footprint calculations...  
as someone said...know the beginning before the end...

But this boat was on a mission and disappeared down the hole,  
the sink hole, the plug hole...

Embodied energy  
Embodied in the materials  
Who counts?

What is emitted?  
plaster and molochite (0.29 and 0.55)  
wax (1.93)  
silicone Rubber (31.50)  
water (0.01)  
sheet glass (20.17)  
and granular glass (0.62)

Indirect Emissions

Energy

From materials...

melting (0.04)

steaming (3.15)

firing (259.99)

Embodied energy in materials

Moving

From one place to another

Me, moving from one place to another

Travelling

Journeywoman (46.78)

Indirect

Emissions

From materials

Moving (2.93)

Travelling

From one place to another

Who counts?  
What is emitted?

Indirect  
emissions  
from being, somewhere, here  
in a building, with lights on and heating (58.21)

So here we are...  
a little boat  
embodied energy  
embodied material journeys...

428.62 carbon kilos  
visualised  
    a little glass paper boat  
    a crashing wave...  
    a plug hole...

down the rabbit hole we went

428.62 carbon kilos

One tree

Say it grows for twenty years

Will absorb 455 kilos of carbon in its life

Or

Maybe

over nineteen trees growing

In one year

Will absorb this carbon footprint

Down this plug hole

a material journey

a map barely explored

One material journey

One tree...

...know the beginning before the end...

## Inge Panneels

With huge thanks

To Creative Carbon Scotland for providing pointers

To Matt Jobling from the National Glass Centre for providing data

But mostly to Tom Jordan for collating the data and doing the calculations
